# Supplementary material for: Short term exposure to low level ambient fine particulate matter and natural cause, cardiovascular, and respiratory morbidity among US adults with health insurance: case time series study
Source: PubMed Central journal article supplement — BMJ. 2024 Feb 21;384:e076322. doi: 10.1136/bmj-2023-076322 (PMC10879982; doi:10.1136/bmj-2023-076322), 2024-02-21
Supplement: suny076322.ww.pdf [file suny076322.ww.pdf]

## **Supplementary Online Content**

### **Short-term exposure to low level ambient fine particulate matter and natural cause, cardiovascular, and respiratory morbidity among US adults with health insurance: case time series study**

Yuantong Sun, research data analyst<sup>1</sup>, Chad W. Milando, research scientist<sup>1</sup>, Keith R. Spangler, research scientist<sup>1</sup>, Yaguang Wei, postdoctoral researcher<sup>2</sup>, Joel Schwartz, professor<sup>2</sup>, Francesca Dominici, professor<sup>3</sup>, Amruta Nori-Sarma, assistant professor<sup>1</sup>, Shengzhi Sun, professor<sup>4,5,6</sup>, Gregory A. Wellenius, professor<sup>1</sup>

#### **Author affiliations**

<sup>1</sup>Department of Environmental Health, Boston University School of Public Health, Boston 02118, MA, USA

<sup>2</sup>Department of Environmental Health, Harvard T.H. Chan School of Public Health, Boston 02115, MA, USA

<sup>3</sup>Department of Biostatistics, Harvard T.H. Chan School of Public Health, Boston 02115, MA, USA

<sup>4</sup>School of Public Health, Capital Medical University, Beijing 100069, China

<sup>5</sup>Beijing Municipal Key Laboratory of Clinical Epidemiology, Capital Medical University, Beijing 100069, China

<sup>6</sup>School of Public Health, The Key Laboratory of Environmental Pollution Monitoring and Disease Control, Ministry of Education Guizhou Medical University, Guiyang 550025, China

## Table of Contents

**eAppendix.** Calculation of excess relative risk, excess events per million enrollees per day

**Table S1.** Codes to identify hospital admissions and emergency department (ED) visits

**Table S2.** The number of US counties included in the analyses

**Table S3.** Number of hospital admissions and emergency department (ED) visits for natural cause, cardiovascular and respiratory diseases by different characteristics in the adult population with health insurance from 2010 to 2016

**Table S4.** Incidence rate of hospital admissions and emergency department visits per million enrollees per day by different characteristics during the study period from 2010 to 2016

**Table S5.** Excess relative risk (%) of hospital admissions and emergency department (ED) visits for natural cause, cardiovascular and respiratory diseases associated with each  $10 \mu\text{g}/\text{m}^3$  increase in  $\text{PM}_{2.5}$ , stratified by age, sex, insurance type and NCA4 regions

**Table S6.** Excess events per million enrollees per day of hospital admissions and emergency department (ED) visits for natural cause, cardiovascular and respiratory diseases associated with each  $10 \mu\text{g}/\text{m}^3$  increase in  $\text{PM}_{2.5}$ , stratified by age, sex, insurance type and NCA4 regions

**Table S7.** Excess relative risk (%) of hospital admissions and emergency department (ED) visits for natural cause, cardiovascular and respiratory diseases associated with each  $10 \mu\text{g}/\text{m}^3$  increase in two-day moving average  $\text{PM}_{2.5}$ ,  $\text{PM}_{2.5}$  on lag day 0 and  $\text{PM}_{2.5}$  on lag day 1

**Table S8.** Excess relative risk (%) of hospital admissions and emergency department (ED) visits for natural cause, cardiovascular and respiratory diseases associated with each  $10 \mu\text{g}/\text{m}^3$  increase in two-day moving average  $\text{PM}_{2.5}$ , results from main model compared with the model adjusted for daily maximum and minimum temperature

**Table S9.** The excess relative risk (%) of hospital admissions and emergency department (ED) visits for natural cause, cardiovascular, and respiratory diseases associated with each  $10 \mu\text{g}/\text{m}^3$  increase in  $\text{PM}_{2.5}$ , with considering the interaction of both temperature and relative humidity splines with NCA4 regions in the models

**Table S10.** Results for analyses with and without filtered days with  $\text{PM}_{2.5}$  above  $15 \mu\text{g}/\text{m}^3$

**Figure S1.** Map for US Global Change Research Program's Fourth National Climate Assessment (NCA4) geographic regions

**Figure S2.** The probability density distribution of  $\text{PM}_{2.5}$  overall and by NCA4 regions

**Figure S3.** Excess relative risk (%) and excess events of emergency department (ED) visits for natural cause, cardiovascular and respiratory diseases associated with each  $10 \mu\text{g}/\text{m}^3$  increase in  $\text{PM}_{2.5}$ , stratified by age, sex, insurance type and NCA4 regions

**Supplemental references**

## **eAppendix. Calculation of excess relative risk, excess events per million enrollees per day**

Excess relative risk was defined as  $(\text{relative risk} - 1) \times 100\%$ .

To calculate the excess events, we first calculated the incidence rate of hospitalizations and emergency department (ED) visits per million enrollees per day using the total number of cause-specific hospitalizations/ED visits during 2010 to 2016 covered by the health insurance divided by the total person-days for the beneficiaries covered by the health plans, which we denoted as  $\alpha$ .<sup>1</sup>

We then calculated the excess events associated with each  $10 \mu\text{g}/\text{m}^3$  increase of two-day moving average  $\text{PM}_{2.5}$  as  $\alpha \times (\text{relative risk} - 1)/\text{relative risk}$ , and its standard error as  $\text{se} = \alpha \times \exp(-\beta_{\text{PM}_{2.5}} \times 10) \times \text{se}(10 \times \beta_{\text{PM}_{2.5}})$  according to the delta method.<sup>2</sup>

**Table S1. Codes to identify hospital admissions and emergency department (ED) visits**

|                                           | Hospital admissions | ED visits                                                  |
|-------------------------------------------|---------------------|------------------------------------------------------------|
| Current Procedure Terminology (CPT codes) | N/A                 | 99281, 99282, 99283, 99284, 99285, 99288                   |
| Revenue codes                             | N/A                 | 0450, 0451, 0452, 0453, 0454, 0455, 0456, 0457, 0458, 0459 |
| Place of service codes                    | 21, 51, 55, 56, 61  | N/A                                                        |

**Table S2. The number of US counties included in the analyses**

| Disease        | Hospital admissions<br>No. (%) | Emergency department<br>visits<br>No. (%) |
|----------------|--------------------------------|-------------------------------------------|
| Natural cause  | 2939 (93.5%)                   | 2939 (93.5%)                              |
| Cardiovascular | 2935 (93.4%)                   | 2937 (93.4%)                              |
| Respiratory    | 2938 (93.4%)                   | 2936 (93.4%)                              |

**Table S3. Number of hospital admissions and emergency department (ED) visits for natural cause, cardiovascular and respiratory diseases by different characteristics in the adult population with health insurance from 2010 to 2016**

|                       | Hospital admissions  |                         |                      | ED Visits             |                         |                      |
|-----------------------|----------------------|-------------------------|----------------------|-----------------------|-------------------------|----------------------|
|                       | Natural Cause        | Cardiovascular diseases | Respiratory diseases | Natural Cause         | Cardiovascular diseases | Respiratory diseases |
| n                     | 10,316,606           | 3,776,606               | 2,263,405            | 24,097,688            | 3,318,642               | 3,513,702            |
| Age, year, %          |                      |                         |                      |                       |                         |                      |
| 18-29                 | 1,086,206<br>(10.5%) | 58,465<br>(1.5%)        | 64,422<br>(2.8%)     | 4,111,577<br>(17.1%)  | 75,536<br>(2.3%)        | 537,433<br>(15.3%)   |
| 30-39                 | 1,377,437<br>(13.4%) | 96,905<br>(2.6%)        | 72,373<br>(3.2%)     | 3,475,573<br>(14.4%)  | 131,708<br>(4.0%)       | 423,927<br>(12.1%)   |
| 40-49                 | 960,831<br>(9.3%)    | 226,546<br>(6.0%)       | 135,524<br>(6.0%)    | 3,556,436<br>(14.8%)  | 269,388<br>(8.1%)       | 435,025<br>(12.4%)   |
| 50-64                 | 2,369,250<br>(23.0%) | 910,556<br>(24.1%)      | 533,605<br>(23.6%)   | 5,421,001<br>(22.5%)  | 797,570<br>(24.0%)      | 762,879<br>(21.7%)   |
| 65-74                 | 1,847,118<br>(17.9%) | 914,520<br>(24.2%)      | 545,617<br>(24.1%)   | 3,168,870<br>(13.2%)  | 733,815<br>(22.1%)      | 545,373<br>(15.5%)   |
| 75+                   | 2,675,764<br>(25.9%) | 1,569,614<br>(41.6%)    | 911,864<br>(40.3%)   | 4,364,231<br>(18.1%)  | 1,310,625<br>(39.5%)    | 809,065<br>(23.0%)   |
| Sex, %                |                      |                         |                      |                       |                         |                      |
| Male                  | 4,088,336<br>(39.6%) | 1,921,260<br>(50.9%)    | 1,095,573<br>(48.4%) | 9,795,370<br>(40.6%)  | 1,632,648<br>(49.2%)    | 1,498,922<br>(42.7%) |
| Female                | 6,228,270<br>(60.4%) | 1,855,346<br>(49.1%)    | 1,167,832<br>(51.6%) | 14,302,318<br>(59.4%) | 1,685,994<br>(50.8%)    | 2,014,780<br>(57.3%) |
| Insurance type, %     |                      |                         |                      |                       |                         |                      |
| Commercial            | 7,111,488<br>(68.9%) | 2,080,915<br>(55.1%)    | 1,207,571<br>(53.4%) | 18,390,500<br>(76.3%) | 1,917,754<br>(57.8%)    | 2,467,421<br>(70.2%) |
| Medicare Advantage    | 3,205,118<br>(31.1%) | 1,695,691<br>(44.9%)    | 1,055,834<br>(46.6%) | 5,707,188<br>(23.7%)  | 1,400,888<br>(42.2%)    | 1,046,281<br>(29.8%) |
| NCA4 region, %        |                      |                         |                      |                       |                         |                      |
| Northeast             | 1,890,683<br>(18.3%) | 781,004<br>(20.7%)      | 444,951<br>(19.7%)   | 3,954,262<br>(16.4%)  | 646,037<br>(19.5%)      | 578,500<br>(16.5%)   |
| Northern great plains | 164,686<br>(1.6%)    | 59,356<br>(1.6%)        | 35,933<br>(1.6%)     | 320,618<br>(1.3%)     | 46,996<br>(1.4%)        | 42,937<br>(1.2%)     |
| Northwest             | 223,030<br>(2.2%)    | 67,000<br>(1.8%)        | 45,556<br>(2.0%)     | 486,842<br>(2.0%)     | 63,982<br>(1.9%)        | 59,840<br>(1.7%)     |
| Midwest               | 2,637,200<br>(25.6%) | 997,964<br>(26.4%)      | 581,669<br>(25.7%)   | 6,224,392<br>(25.8%)  | 852,707<br>(25.7%)      | 955,095<br>(27.2%)   |
| Southeast             | 3,097,262<br>(30.0%) | 1,211,376<br>(32.1%)    | 736,935<br>(32.6%)   | 7,496,185<br>(31.1%)  | 1,094,849<br>(33.0%)    | 1,112,254<br>(31.7%) |

|                       |                      |                   |                   |                      |                    |                    |
|-----------------------|----------------------|-------------------|-------------------|----------------------|--------------------|--------------------|
| Southern great plains | 1,208,654<br>(11.7%) | 353,534<br>(9.4%) | 215,825<br>(9.5%) | 3,111,791<br>(12.9%) | 330,549<br>(10.0%) | 429,063<br>(12.2%) |
| Southwest             | 1,095,091<br>(10.6%) | 306,372<br>(8.1%) | 202,536<br>(8.9%) | 2,503,598<br>(10.4%) | 283,522<br>(8.5%)  | 336,013<br>(9.6%)  |

---

Abbreviations: NCA4 region= geographic regions as defined by the US Global Change Research Program's Fourth National Climate Assessment; ED=emergency department.

**Table S4. Incidence rate of hospital admissions and emergency department (ED) visits per million enrollees per day by different characteristics during the study period from 2010 to 2016**

|                       | Hospital admissions |                         |                      | ED Visits     |                         |                      |
|-----------------------|---------------------|-------------------------|----------------------|---------------|-------------------------|----------------------|
|                       | Natural Cause       | Cardiovascular diseases | Respiratory diseases | Natural Cause | Cardiovascular diseases | Respiratory diseases |
| Overall               | 207.9               | 76.1                    | 45.6                 | 485.7         | 66.9                    | 70.8                 |
| Age, years            |                     |                         |                      |               |                         |                      |
| 18-29                 | 116.6               | 6.3                     | 6.9                  | 441.5         | 8.1                     | 57.7                 |
| 30-39                 | 160.3               | 11.3                    | 8.4                  | 404.4         | 15.3                    | 49.3                 |
| 40-49                 | 103.3               | 24.4                    | 14.6                 | 382.3         | 29.0                    | 46.8                 |
| 50-64                 | 182.8               | 70.3                    | 41.2                 | 418.3         | 61.5                    | 58.9                 |
| 65-74                 | 337.8               | 167.2                   | 99.8                 | 579.4         | 134.2                   | 99.7                 |
| 75+                   | 672.7               | 394.6                   | 229.2                | 1097.2        | 329.5                   | 203.4                |
| Sex                   |                     |                         |                      |               |                         |                      |
| Male                  | 172.3               | 81.0                    | 46.2                 | 412.8         | 68.8                    | 63.2                 |
| Female                | 240.6               | 71.7                    | 45.1                 | 552.5         | 65.1                    | 77.8                 |
| Insurance type        |                     |                         |                      |               |                         |                      |
| Commercial            | 162.2               | 47.5                    | 27.5                 | 419.5         | 43.7                    | 56.3                 |
| Medicare Advantage    | 554.4               | 293.3                   | 182.6                | 987.2         | 242.3                   | 181.0                |
| NCA4 region           |                     |                         |                      |               |                         |                      |
| Northeast             | 225.4               | 93.1                    | 53.0                 | 471.3         | 77.0                    | 69.0                 |
| Northern great plains | 253.3               | 91.3                    | 55.3                 | 493.1         | 72.3                    | 66.0                 |
| Northwest             | 181.4               | 54.5                    | 37.0                 | 395.9         | 52.0                    | 48.7                 |
| Midwest               | 231.1               | 87.4                    | 51.0                 | 545.4         | 74.7                    | 83.7                 |
| Southeast             | 227.5               | 89.0                    | 54.1                 | 550.5         | 80.4                    | 81.7                 |
| Southern great plains | 164.5               | 48.1                    | 29.4                 | 423.5         | 45.0                    | 58.4                 |
| Southwest             | 157.1               | 44.0                    | 29.1                 | 359.2         | 40.7                    | 48.2                 |

Abbreviations: NCA4 = US Global Change Research Program's Fourth National Climate Assessment



**Table S5. Excess relative risk (%) of hospital admissions and emergency department (ED) visits for natural cause, cardiovascular and respiratory diseases associated with each 10 µg/m<sup>3</sup> increase in PM<sub>2.5</sub>, stratified by age, sex, insurance type and NCA4 regions**

|                       | Hospital admissions    |                         |                       | ED Visits              |                         |                       |
|-----------------------|------------------------|-------------------------|-----------------------|------------------------|-------------------------|-----------------------|
|                       | Natural Cause          | Cardiovascular diseases | Respiratory diseases  | Natural Cause          | Cardiovascular diseases | Respiratory diseases  |
| Overall               | 0.91<br>(0.55, 1.26)   | 1.39<br>(0.81, 1.98)    | 1.90<br>(1.15, 2.66)  | 0.20<br>(-0.03, 0.43)  | 0.43<br>(-0.18, 1.05)   | 1.34<br>(0.73, 1.94)  |
| Age, years            | P<0.001                | P=0.06                  | P=0.80                | P=0.007                | P=0.19                  | P=0.35                |
| 18-29                 | 0.36<br>(-0.72, 1.45)  | 2.46<br>(-2.13, 7.27)   | 3.40<br>(-1.02, 8.01) | 0.45<br>(-0.10, 1.01)  | 2.51<br>(-1.53, 6.72)   | 1.95<br>(0.42, 3.50)  |
| 30-39                 | -0.61<br>(-1.56, 0.36) | 3.07<br>(-0.54, 6.82)   | 2.57<br>(-1.56, 6.87) | 0.09<br>(-0.52, 0.69)  | 1.89<br>(-1.18, 5.05)   | 1.91<br>(0.19, 3.65)  |
| 40-49                 | 0.20<br>(-0.94, 1.35)  | -0.25<br>(-2.55, 2.11)  | 2.35<br>(-0.68, 5.46) | -0.39<br>(-0.98, 0.20) | -1.44<br>(-3.52, 0.69)  | 2.57<br>(0.87, 4.30)  |
| 50-64                 | 0.40<br>(-0.33, 1.14)  | 0.07<br>(-1.10, 1.24)   | 1.22<br>(-0.31, 2.76) | -0.27<br>(-0.75, 0.21) | -0.37<br>(-1.60, 0.88)  | 0.86<br>(-0.40, 2.15) |
| 65-74                 | 1.43<br>(0.60, 2.26)   | 1.71<br>(0.54, 2.89)    | 2.60<br>(1.09, 4.14)  | 0.46<br>(-0.17, 1.09)  | 0.75<br>(-0.54, 2.06)   | 1.03<br>(-0.45, 2.54) |
| 75+                   | 2.21<br>(1.52, 2.91)   | 2.08<br>(1.18, 2.99)    | 1.68<br>(0.51, 2.86)  | 0.93<br>(0.39, 1.46)   | 0.88<br>(-0.09, 1.86)   | 0.49<br>(-0.73, 1.73) |
| Sex                   | P=0.01                 | P=0.85                  | P=0.84                | P=0.59                 | P=0.42                  | P=0.74                |
| Male                  | 1.48<br>(0.92, 2.05)   | 1.45<br>(0.63, 2.27)    | 1.82<br>(0.75, 2.91)  | 0.27<br>(-0.09, 0.63)  | 0.69<br>(-0.19, 1.57)   | 1.46<br>(0.54, 2.38)  |
| Female                | 0.53<br>(0.07, 0.98)   | 1.34<br>(0.51, 2.17)    | 1.97<br>(0.93, 3.02)  | 0.14<br>(-0.15, 0.44)  | 0.18<br>(-0.67, 1.05)   | 1.25<br>(0.46, 2.04)  |
| Insurance type        | P=0.009                | P=0.47                  | P=0.75                | P=0.44                 | P=0.04                  | P=0.09                |
| Commercial            | 0.58<br>(0.16, 1.01)   | 1.19<br>(0.40, 1.98)    | 2.02<br>(0.99, 3.07)  | 0.14<br>(-0.13, 0.40)  | -0.12<br>(-0.93, 0.59)  | 1.66<br>(0.94, 2.38)  |
| Medicare Advantage    | 1.60<br>(0.97, 2.23)   | 1.62<br>(0.77, 2.49)    | 1.78<br>(0.69, 2.87)  | 0.35<br>(-0.11, 0.81)  | 1.16<br>(0.23, 2.11)    | 0.52<br>(-0.55, 1.61) |
| NCA4 region           | P<0.001                | P=0.005                 | P=0.11                | P<0.001                | P=0.10                  | P<0.001               |
| Northeast             | 2.81<br>(1.94, 3.68)   | 3.22<br>(1.89, 4.57)    | 2.00<br>(0.28, 3.75)  | 0.85<br>(0.26, 1.44)   | 1.50<br>(0.07, 2.95)    | 1.07<br>(-0.43, 2.59) |
| Northern great plains | 1.48<br>(-1.43, 4.47)  | 5.56<br>(0.59, 10.78)   | 9.69<br>(3.11, 16.70) | 2.37<br>(0.26, 4.53)   | 5.42<br>(-0.16, 11.32)  | 2.99<br>(-2.69, 8.99) |
| Northwest             | -0.72<br>(-3.11, 1.73) | -2.61<br>(-6.82, 1.79)  | 1.64<br>(-3.60, 7.17) | -0.11<br>(-1.75, 1.56) | -4.18<br>(-8.43, 0.27)  | 3.15<br>(-1.51, 8.02) |
| Midwest               | 0.71<br>(0.00, 1.42)   | 1.31<br>(0.17, 2.46)    | 3.16<br>(1.66, 4.69)  | -0.28<br>(-0.74, 0.17) | 0.35<br>(-0.86, 1.57)   | 1.61<br>(0.46, 2.78)  |
| Southeast             | 0.76                   | 1.16                    | 1.01                  | -0.21                  | 0.12                    | 0.08                  |

|                       |                        |                        |                       |                       |                        |                       |
|-----------------------|------------------------|------------------------|-----------------------|-----------------------|------------------------|-----------------------|
|                       | (0.13, 1.40)           | (0.16, 2.18)           | (-0.27, 2.30)         | (-0.61, 0.20)         | (-0.93, 1.17)          | (-0.96, 1.13)         |
| Southern great plains | 0.11<br>(-0.97, 1.20)  | 0.54<br>(-1.43, 2.56)  | 2.32<br>(-0.23, 4.94) | 1.39<br>(0.70, 2.07)  | 0.79<br>(-1.25, 2.88)  | 5.64<br>(3.77, 7.54)  |
| Southwest             | -0.02<br>(-1.22, 1.20) | -1.03<br>(-3.27, 1.27) | 1.22<br>(-1.59, 4.12) | 0.36<br>(-0.45, 1.16) | -0.73<br>(-3.08, 1.68) | 0.63<br>(-1.56, 2.87) |

---

Abbreviations: PM<sub>2.5</sub> = fine particulate matter; NCA4 = US Global Change Research Program's Fourth National Climate Assessment

**Table S6. Excess events per million enrollees per day of hospital admissions and emergency department (ED) visits for natural cause, cardiovascular and respiratory diseases associated with each 10  $\mu\text{g}/\text{m}^3$  increase in  $\text{PM}_{2.5}$ , stratified by age, sex, insurance type and NCA4 regions**

|                       | Hospital admissions     |                         |                       | ED Visits              |                         |                       |
|-----------------------|-------------------------|-------------------------|-----------------------|------------------------|-------------------------|-----------------------|
|                       | Natural Cause           | Cardiovascular diseases | Respiratory diseases  | Natural Cause          | Cardiovascular diseases | Respiratory diseases  |
| Overall               | 1.87<br>(1.14, 2.59)    | 1.04<br>(0.61, 1.48)    | 0.85<br>(0.52, 1.18)  | 0.95<br>(-0.17, 2.07)  | 0.29<br>(-0.12, 0.69)   | 0.93<br>(0.52, 1.35)  |
| Age, years            |                         |                         |                       |                        |                         |                       |
| 18-29                 | 0.41<br>(-0.84, 1.67)   | 0.15<br>(-0.13, 0.43)   | 0.23<br>(-0.07, 0.52) | 2.00<br>(-0.44, 4.44)  | 0.20<br>(-0.12, 0.52)   | 1.10<br>(0.25, 1.96)  |
| 30-39                 | -0.98<br>(-2.53, 0.58)  | 0.34<br>(-0.05, 0.73)   | 0.21<br>(-0.13, 0.55) | 0.35<br>(-2.09, 2.78)  | 0.28<br>(-0.18, 0.74)   | 0.92<br>(0.10, 1.74)  |
| 40-49                 | 0.20<br>(-0.98, 1.38)   | -0.06<br>(-0.63, 0.51)  | 0.33<br>(-0.09, 0.76) | -1.50<br>(-3.78, 0.79) | -0.42<br>(-1.05, 0.20)  | 1.17<br>(0.41, 1.93)  |
| 50-64                 | 0.73<br>(-0.59, 2.06)   | 0.05<br>(-0.77, 0.87)   | 0.49<br>(-0.12, 1.11) | -1.14<br>(-3.17, 0.88) | -0.23<br>(-1.00, 0.54)  | 0.50<br>(-0.23, 1.24) |
| 65-74                 | 4.76<br>(2.04, 7.48)    | 2.81<br>(0.91, 4.71)    | 2.53<br>(1.08, 3.98)  | 2.64<br>(-0.95, 6.23)  | 1.00<br>(-0.71, 2.71)   | 1.02<br>(-0.44, 2.48) |
| 75+                   | 14.57<br>(10.09, 19.06) | 8.04<br>(4.61, 11.47)   | 3.79<br>(1.18, 6.40)  | 10.06<br>(4.27, 15.86) | 2.87<br>(-0.30, 6.03)   | 1.00<br>(-1.47, 3.48) |
| Sex                   |                         |                         |                       |                        |                         |                       |
| Male                  | 2.52<br>(1.58, 3.46)    | 1.15<br>(0.51, 1.80)    | 0.83<br>(0.35, 1.31)  | 1.12<br>(-0.36, 2.60)  | 0.47<br>(-0.13, 1.06)   | 0.91<br>(0.34, 1.47)  |
| Female                | 1.26<br>(0.18, 2.34)    | 0.95<br>(0.37, 1.52)    | 0.87<br>(0.42, 1.33)  | 0.79<br>(-0.85, 2.44)  | 0.12<br>(-0.44, 0.68)   | 0.96<br>(0.36, 1.56)  |
| Insurance type        |                         |                         |                       |                        |                         |                       |
| Commercial            | 0.94<br>(0.25, 1.63)    | 0.56<br>(0.19, 0.92)    | 0.55<br>(0.27, 0.82)  | 0.58<br>(-0.54, 1.69)  | -0.05<br>(-0.41, 0.30)  | 0.92<br>(0.52, 1.31)  |
| Medicare Advantage    | 8.71<br>(5.33, 12.09)   | 4.69<br>(2.24, 7.14)    | 3.19<br>(1.27, 5.11)  | 3.43<br>(-1.12, 7.99)  | 2.79<br>(0.56, 5.02)    | 0.94<br>(-0.99, 2.87) |
| NCA4 region           |                         |                         |                       |                        |                         |                       |
| Northeast             | 6.15<br>(4.30, 8.00)    | 2.91<br>(1.74, 4.08)    | 1.04<br>(0.15, 1.92)  | 3.97<br>(1.23, 6.70)   | 1.14<br>(0.06, 2.22)    | 0.73<br>(-0.29, 1.75) |
| Northern great plains | 3.68<br>(-3.56, 10.93)  | 4.81<br>(0.64, 8.99)    | 4.88<br>(1.77, 8.00)  | 11.42<br>(1.38, 21.46) | 3.72<br>(-0.02, 7.45)   | 1.91<br>(-1.72, 5.55) |
| Northwest             | -1.32<br>(-5.77, 3.13)  | -1.46<br>(-3.93, 1.01)  | 0.60<br>(-1.33, 2.53) | -0.43<br>(-6.99, 6.14) | -2.27<br>(-4.73, 0.19)  | 1.48<br>(-0.69, 3.66) |
| Midwest               | 1.62<br>(0.01, 3.23)    | 1.13<br>(0.15, 2.11)    | 1.56<br>(0.84, 2.29)  | -1.54<br>(-4.03, 0.95) | 0.26<br>(-0.64, 1.16)   | 1.33<br>(0.39, 2.27)  |
| Southeast             | 1.72                    | 1.02                    | 0.54                  | -1.13                  | 0.09                    | 0.06                  |

|                          |                        |                        |                       |                       |                        |                       |
|--------------------------|------------------------|------------------------|-----------------------|-----------------------|------------------------|-----------------------|
|                          | (0.30, 3.14)           | (0.14, 1.90)           | (-0.14, 1.22)         | (-3.37, 1.10)         | (-0.75, 0.94)          | (-0.78, 0.91)         |
| Southern great<br>plains | 0.18<br>(-1.60, 1.96)  | 0.26<br>(-0.69, 1.21)  | 0.67<br>(-0.06, 1.39) | 5.79<br>(2.97, 8.60)  | 0.35<br>(-0.56, 1.27)  | 3.12<br>(2.13, 4.10)  |
| Southwest                | -0.03<br>(-1.93, 1.87) | -0.46<br>(-1.48, 0.56) | 0.35<br>(-0.46, 1.16) | 1.27<br>(-1.60, 4.14) | -0.30<br>(-1.28, 0.69) | 0.30<br>(-0.75, 1.36) |

---

Abbreviations: PM<sub>2.5</sub> = fine particulate matter; NCA4 = US Global Change Research Program's Fourth National Climate Assessment

**Table S7. Excess relative risk (%) of hospital admissions and emergency department (ED) visits for natural cause, cardiovascular and respiratory diseases associated with each 10  $\mu\text{g}/\text{m}^3$  increase in two-day moving average  $\text{PM}_{2.5}$ ,  $\text{PM}_{2.5}$  on lag day 0 and  $\text{PM}_{2.5}$  on lag day 1**

| Disease                | Two-day moving average $\text{PM}_{2.5}$ | $\text{PM}_{2.5}$ on lag day 0 | $\text{PM}_{2.5}$ on lag day 1 |
|------------------------|------------------------------------------|--------------------------------|--------------------------------|
| Natural cause          |                                          |                                |                                |
| Hospital admissions    | 0.91 (0.55,1.26)                         | 0.86 (0.52,1.19)               | 0.04 (-0.31, 0.38)             |
| ED visits              | 0.20 (-0.03,0.43)                        | 1.07 (0.85,1.29)               | -0.90 (-1.12, -0.67)           |
| Cardiovascular disease |                                          |                                |                                |
| Hospital admissions    | 1.39 (0.81,1.98)                         | 1.09 (0.54,1.64)               | 0.29 (-0.27,0.84)              |
| ED visits              | 0.43 (-0.18,1.05)                        | 0.91 (0.33,1.50)               | -0.50 (-1.09,0.09)             |
| Respiratory Disease    |                                          |                                |                                |
| Hospital admissions    | 1.90 (1.15,2.66)                         | 0.86 (0.16,1.57)               | 1.03 (0.31,1.76)               |
| ED visits              | 1.34 (0.73,1.94)                         | 0.66 (0.09,1.23)               | 0.67 (0.09,1.25)               |

**Table S8. Excess relative risk (%) of hospital admissions and emergency department (ED) visits for natural cause, cardiovascular and respiratory diseases associated with each 10  $\mu\text{g}/\text{m}^3$  increase in two-day moving average  $\text{PM}_{2.5}$ , results from main model compared with the model adjusted for daily maximum and minimum temperature**

| Disease                | Main model<br>(adjusted for daily mean<br>temperature) | Sensitivity analysis<br>(adjusted for daily maximum<br>temperature) | Sensitivity analysis<br>(adjusted for daily minimum<br>temperature) |
|------------------------|--------------------------------------------------------|---------------------------------------------------------------------|---------------------------------------------------------------------|
| Natural cause          |                                                        |                                                                     |                                                                     |
| Hospital admissions    | 0.91 (0.55,1.26)                                       | 0.74 (0.38, 1.11)                                                   | 1.13 (0.79, 1.48)                                                   |
| ED visits              | 0.20 (-0.03,0.43)                                      | 0.04 (-0.20, 0.27)                                                  | 0.65 (0.42, 0.88)                                                   |
| Cardiovascular disease |                                                        |                                                                     |                                                                     |
| Hospital admissions    | 1.39 (0.81,1.98)                                       | 1.21 (0.62, 1.80)                                                   | 1.61 (1.04, 2.18)                                                   |
| ED visits              | 0.43 (-0.18,1.05)                                      | 0.20 (-0.43, 0.82)                                                  | 0.77 (0.16, 1.37)                                                   |
| Respiratory Disease    |                                                        |                                                                     |                                                                     |
| Hospital admissions    | 1.90 (1.15,2.66)                                       | 1.79 (1.03, 2.56)                                                   | 2.01 (1.28, 2.76)                                                   |
| ED visits              | 1.34 (0.73,1.94)                                       | 1.30 (0.69, 1.92)                                                   | 1.26 (0.67, 1.85)                                                   |

**Table S9. The excess relative risk (%) of hospital admissions and emergency department (ED) visits for natural cause, cardiovascular, and respiratory diseases associated with each 10  $\mu\text{g}/\text{m}^3$  increase in  $\text{PM}_{2.5}$ , with considering the interaction of both temperature and relative humidity splines with NCA4 regions in the models**

| Disease                | Main model<br>(interact temperature splines<br>with NCA4 regions) | Sensitivity analysis<br>(interact both temperature<br>and relative humidity splines<br>with NCA4 regions) |
|------------------------|-------------------------------------------------------------------|-----------------------------------------------------------------------------------------------------------|
| Natural cause          |                                                                   |                                                                                                           |
| Hospital admissions    | 0.91 (0.55, 1.26)                                                 | 0.94 (0.57, 1.30)                                                                                         |
| ED visits              | 0.20 (-0.03, 0.43)                                                | 0.23 (0.00, 0.47)                                                                                         |
| Cardiovascular disease |                                                                   |                                                                                                           |
| Hospital admissions    | 1.39 (0.81, 1.98)                                                 | 1.41 (0.82, 2.00)                                                                                         |
| ED visits              | 0.43 (-0.18, 1.05)                                                | 0.43 (-0.20, 1.05)                                                                                        |
| Respiratory Disease    |                                                                   |                                                                                                           |
| Hospital admissions    | 1.90 (1.15, 2.66)                                                 | 2.01 (1.25, 2.78)                                                                                         |
| ED visits              | 1.34 (0.73, 1.94)                                                 | 1.43 (0.82, 2.04)                                                                                         |

**Table S10. Results for analyses with and without filtered days with PM<sub>2.5</sub> above 15 µg/m<sup>3</sup>.**

| Disease                | Main model<br>(restrict PM <sub>2.5</sub> ≤ 15 µg/m <sup>3</sup> ) | Sensitivity analysis<br>(unrestricted PM <sub>2.5</sub> ) |
|------------------------|--------------------------------------------------------------------|-----------------------------------------------------------|
| Natural cause          |                                                                    |                                                           |
| Hospital admissions    | 0.91 (0.55, 1.26)                                                  | 0.86 (0.66, 1.06)                                         |
| ED visits              | 0.20 (-0.03, 0.43)                                                 | 0.06 (-0.07, 0.19)                                        |
| Cardiovascular disease |                                                                    |                                                           |
| Hospital admissions    | 1.39 (0.81, 1.98)                                                  | 1.11 (0.78, 1.43)                                         |
| ED visits              | 0.43 (-0.18, 1.05)                                                 | 0.60 (0.26, 0.95)                                         |
| Respiratory Disease    |                                                                    |                                                           |
| Hospital admissions    | 1.90 (1.15, 2.66)                                                  | 1.04 (0.62, 1.46)                                         |
| ED visits              | 1.34 (0.73, 1.94)                                                  | -0.03 (-0.36, 0.30)                                       |



**Figure S1.** Map for US Global Change Research Program's Fourth National Climate Assessment (NCA4) geographic regions

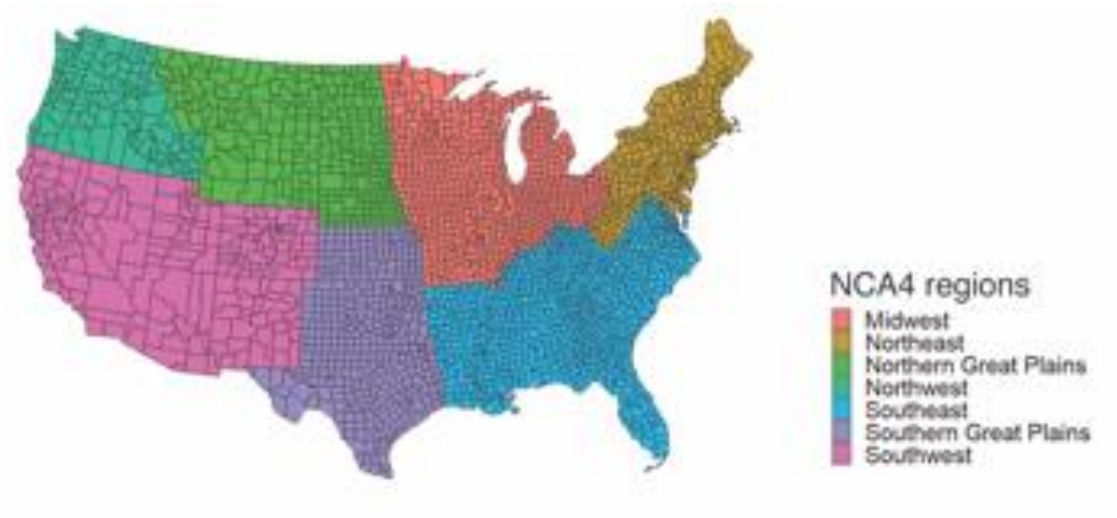

**Figure S2.** The probability density distribution of PM<sub>2.5</sub> overall and by NCA4 regions

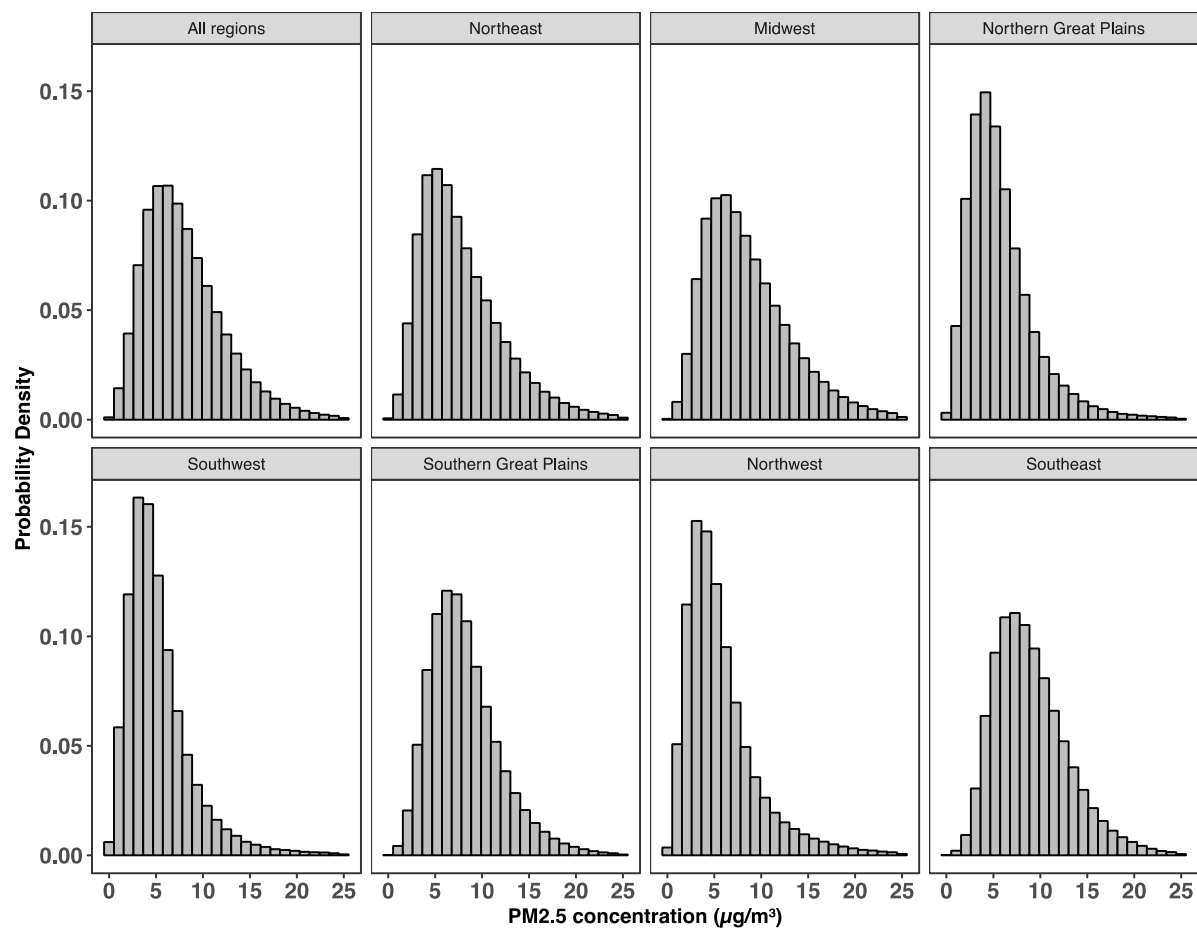

**Figure S3.** Excess relative risk (%) and excess events of emergency department (ED) visits for natural cause, cardiovascular and respiratory diseases associated with each 10  $\mu\text{g}/\text{m}^3$  increase in  $\text{PM}_{2.5}$ , stratified by age, sex, insurance type and NCA4 regions

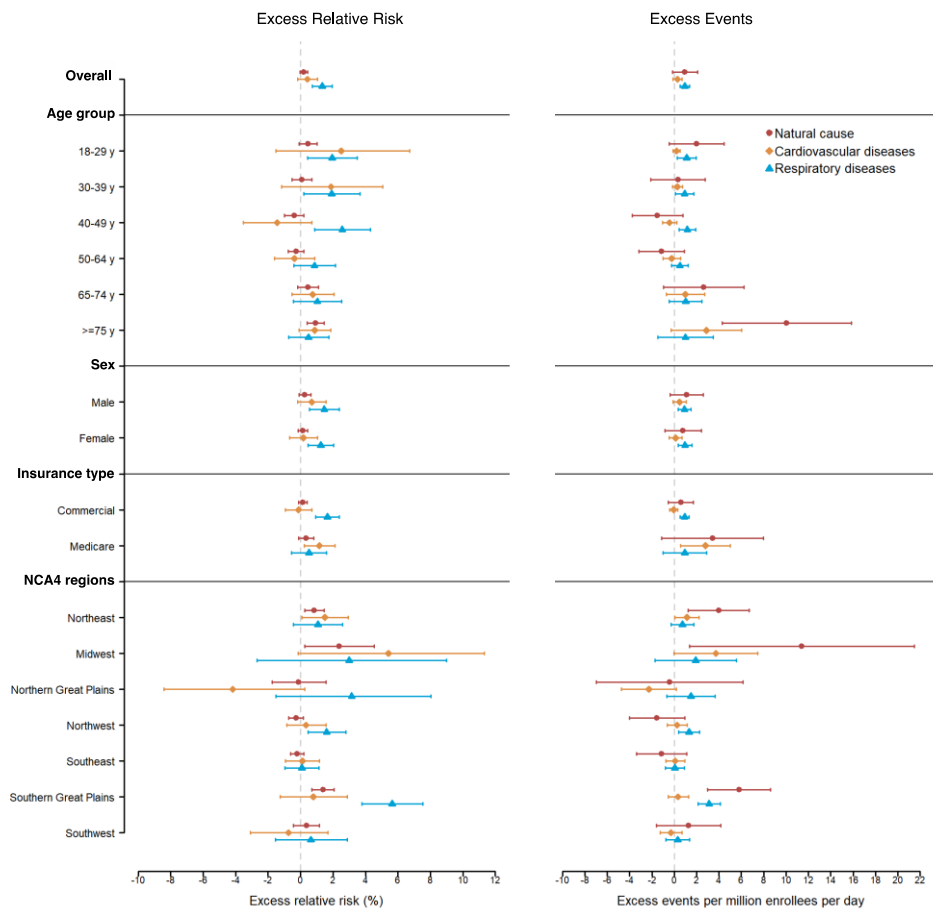

## Supplemental references

1. Sun, S., Weinberger, K. R., Nori-Sarma, A., Spangler, K. R., Sun, Y., Dominici, F., & Wellenius, G. A. (2021). Ambient heat and risks of emergency department visits among adults in the United States: Time stratified case crossover study. *BMJ (Clinical Research Ed.)*, 375, e065653. <https://doi.org/10.1136/bmj-2021-065653>
2. Di, Q., Dai, L., Wang, Y., Zanobetti, A., Choirat, C., Schwartz, J. D., & Dominici, F. (2017). Association of Short-term Exposure to Air Pollution With Mortality in Older Adults. *JAMA*, 318(24), 2446–2456. <https://doi.org/10.1001/jama.2017.17923>
